# Supplementary material for: The Microbial Metabolite Butyrate Stimulates Bone Formation via T Regulatory Cell-Mediated Regulation of WNT10B Expression
Source: PubMed Central journal article supplement — Immunity. Author manuscript; Available in PMC 2019 Jan 24. (PMC6345170; doi:10.1016/j.immuni.2018.10.013), 2018-11-13
Supplement: NIHMS1517299-supplement-1.pdf [file NIHMS1517299-supplement-1.pdf]

**Immunity, Volume 49**

**Supplemental Information**

**The Microbial Metabolite Butyrate Stimulates  
Bone Formation via T Regulatory Cell-Mediated  
Regulation of WNT10B Expression**

**Abdul Malik Tyagi, Mingcan Yu, Trevor M. Darby, Chiara Vaccaro, Jau-Yi Li, Joshua A. Owens, Emory Hsu, Jonathan Adams, M. Neale Weitzmann, Rheinallt M. Jones, and Roberto Pacifici**

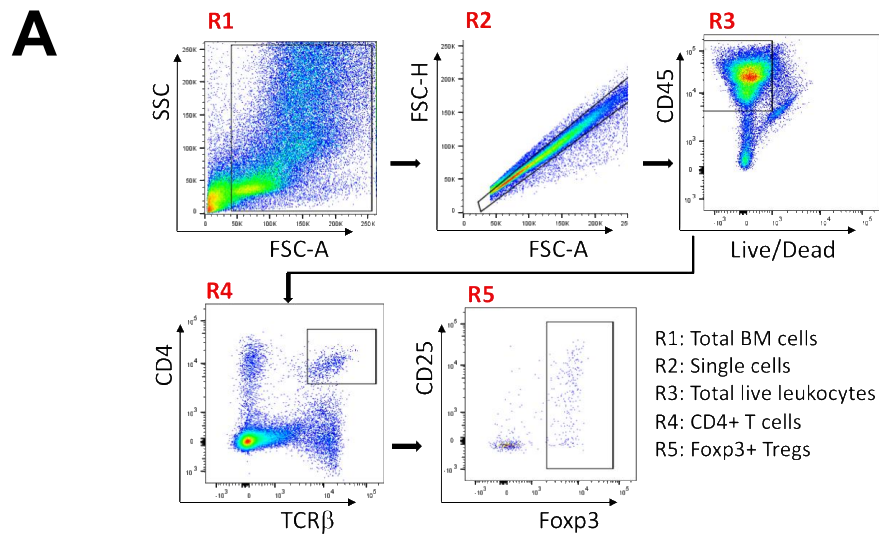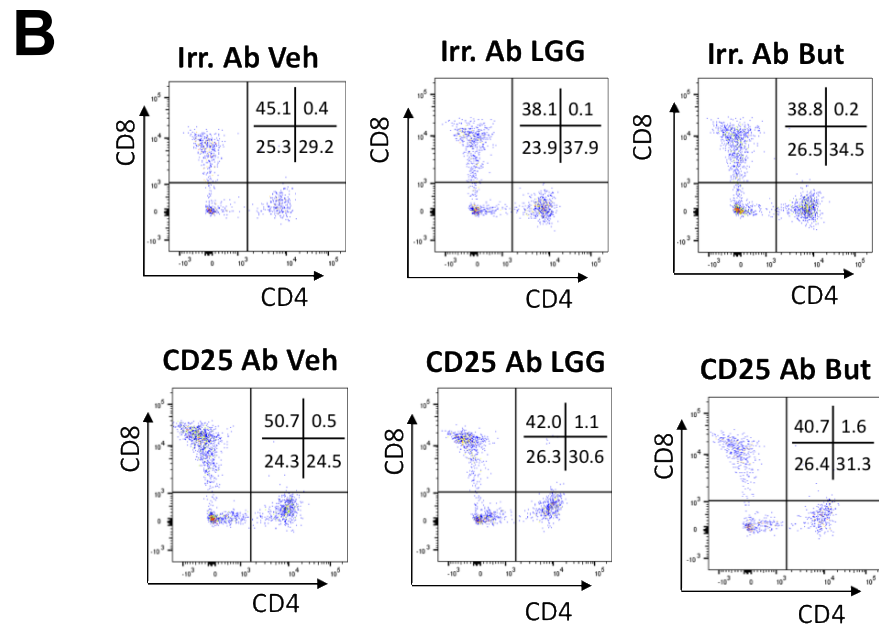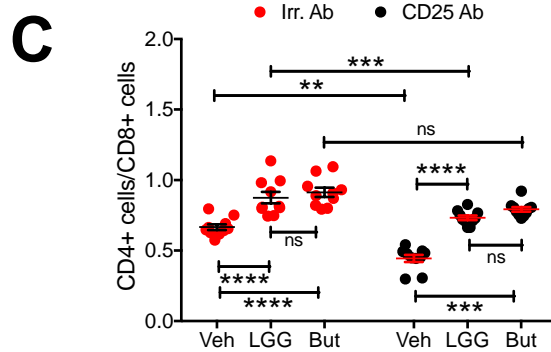

**Figure S1 (Related to Figure 1).** Gating strategy used to identify bone marrow (BM) Treg cells by flow cytometry and effects of LGG, butyrate (but) or anti-CD25 Ab on the relative frequency of BM CD4<sup>+</sup> and CD8<sup>+</sup> cells. Following red cells lysis, single cell suspensions were prepared from BM, and stained with antibodies to the indicated antigens and live/dead cell dye. **A.** Gated regions are numbered from R1 to R5. The figure shows one representative gating of flow cytometric plot. **B.** The figure shows one representative flow cytometric plot per group. The numbers in each plot represent the frequency of cells in the corresponding quadrant. **C.** Average CD4<sup>+</sup>/CD8<sup>+</sup> cells ratio. n = 10 samples per group. Data were expressed as Mean  $\pm$  SEM. Data were normally distributed according to the Shapiro-Wilk normality test. Data and analyzed by two-way ANOVA and post hoc tests applying the Bonferroni correction for multiple comparisons. \*\* = p<0.01, \*\*\* = p<0.001 and \*\*\*\* = p<0.0001 compared to the indicated group. ns = not significant.

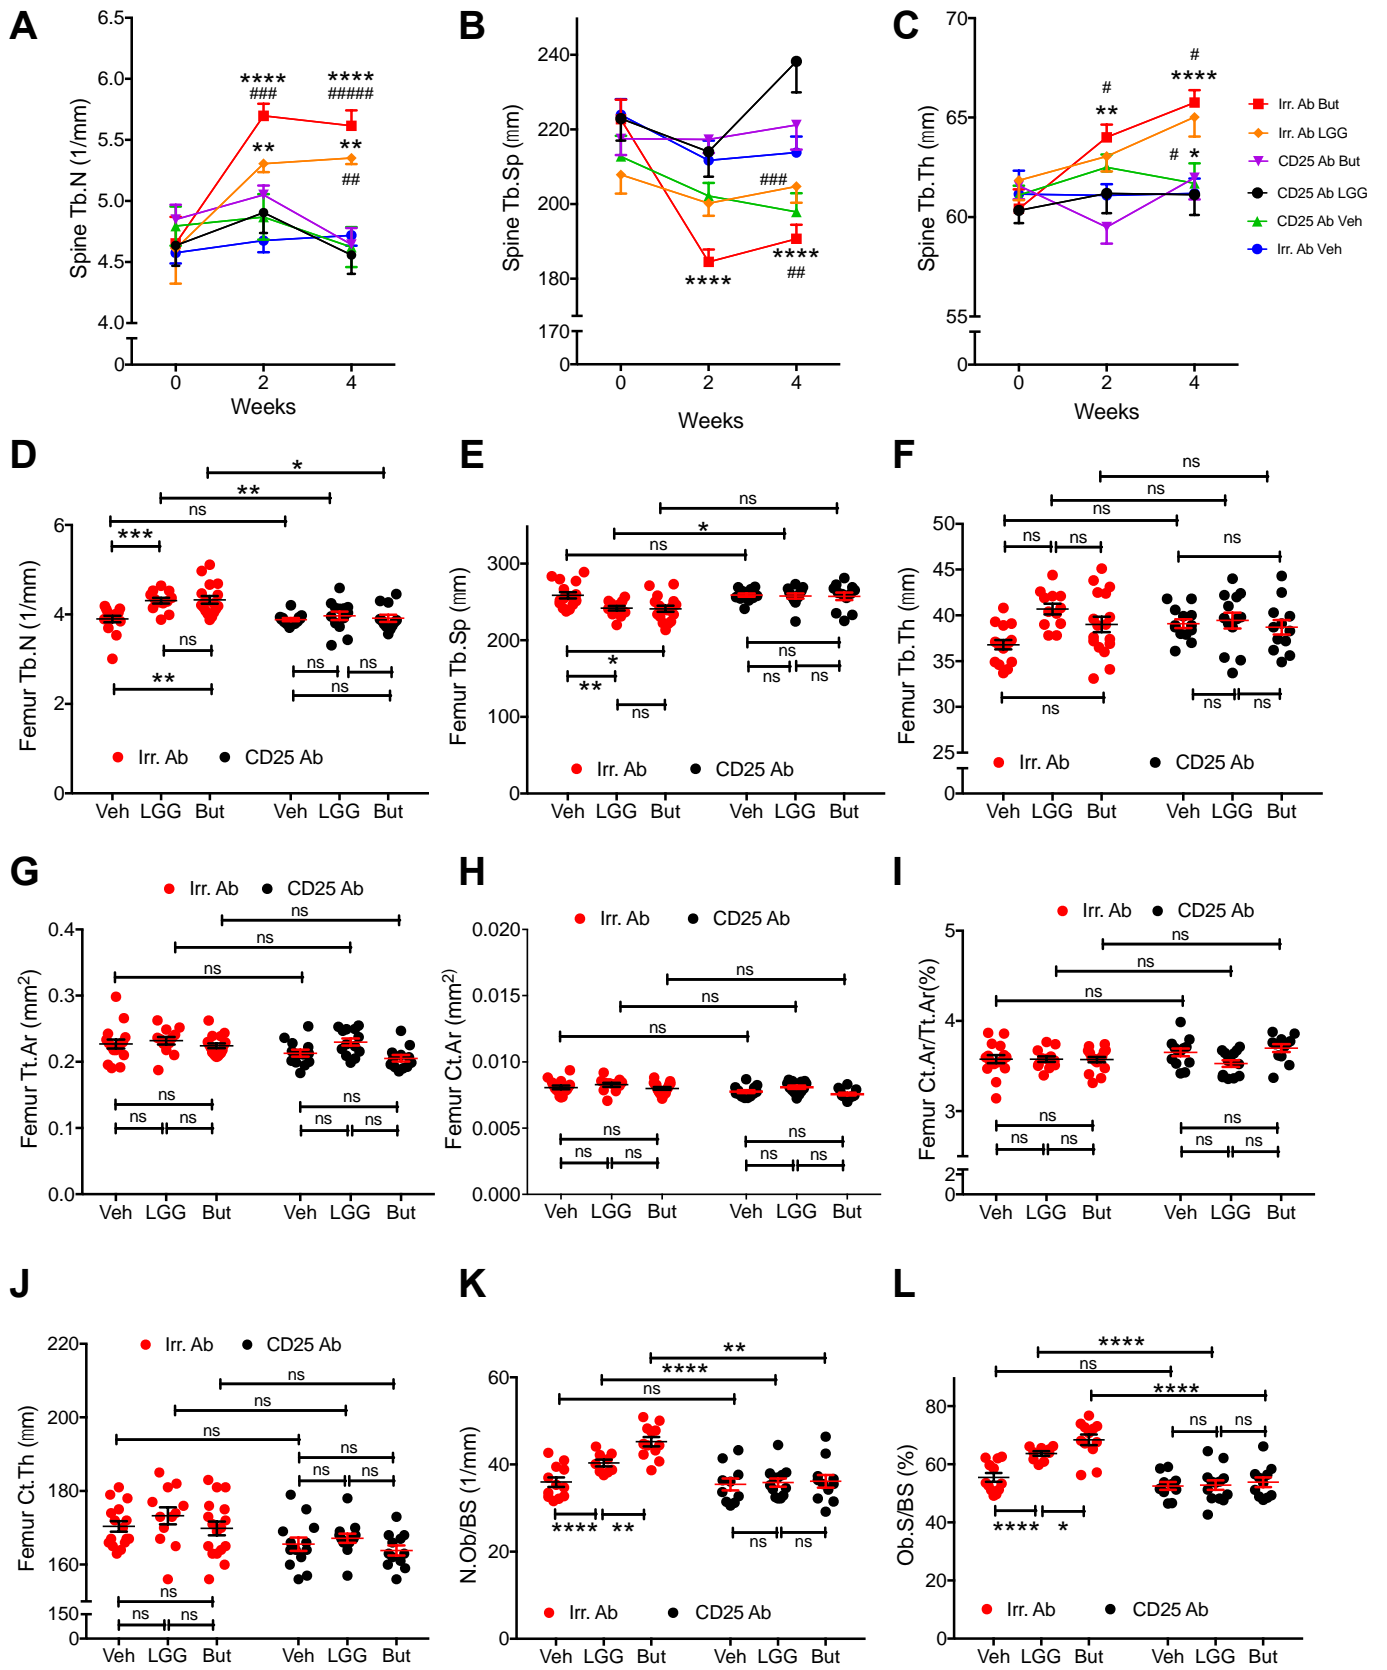

**Figure S2 (Related to Figure 2).** Treatment with anti-CD25 Ab prevents the bone anabolic activity of LGG and butyrate (But). **A-C.** Prospective measurements of vertebral trabecular number (Tb.N), trabecular separation (Tb.Sp) and trabecular thickness (Tb.Th) by in vivo  $\mu$ CT scanning. **D-J.** Cross-sectional measurements of femoral Tb.N, Tb.Sp, Tb.Th, total cross-sectional area (Tt.Ar), cortical bone area (Ct.Ar), cortical area fraction (Ct.Ar/Tt.Ar), cortical thickness (Ct.Th) by in vitro  $\mu$ CT scanning. **K, L.** The number of osteoblasts per mm bone surface (N.Ob/BS), and the percentage of bone surface covered by osteoblasts (Ob.S/BS) as measured by bone histomorphometry. n=11-17 mice per group. Data were expressed as Mean  $\pm$  SEM. All data were normally distributed according to the Shapiro-Wilk normality test. For Panel A-C data were analyzed by ANOVA for repeated measures. \* =  $p < 0.05$ , \*\* =  $p < 0.01$ , and \*\*\*\* =  $p < 0.0001$  compared to baseline, # =  $p < 0.05$ , ## =  $p < 0.01$ , ### =  $p < 0.001$  and #### =  $p < 0.0001$  compared to Irrelevant (Irr) Ab vehicle. All other data were analyzed by two-way ANOVA and post hoc tests applying the Bonferroni correction for multiple comparisons. \* =  $p < 0.05$ , \*\* =  $p < 0.01$ , \*\*\* and =  $p < 0.001$  compared to the indicated group. ns = not significant.

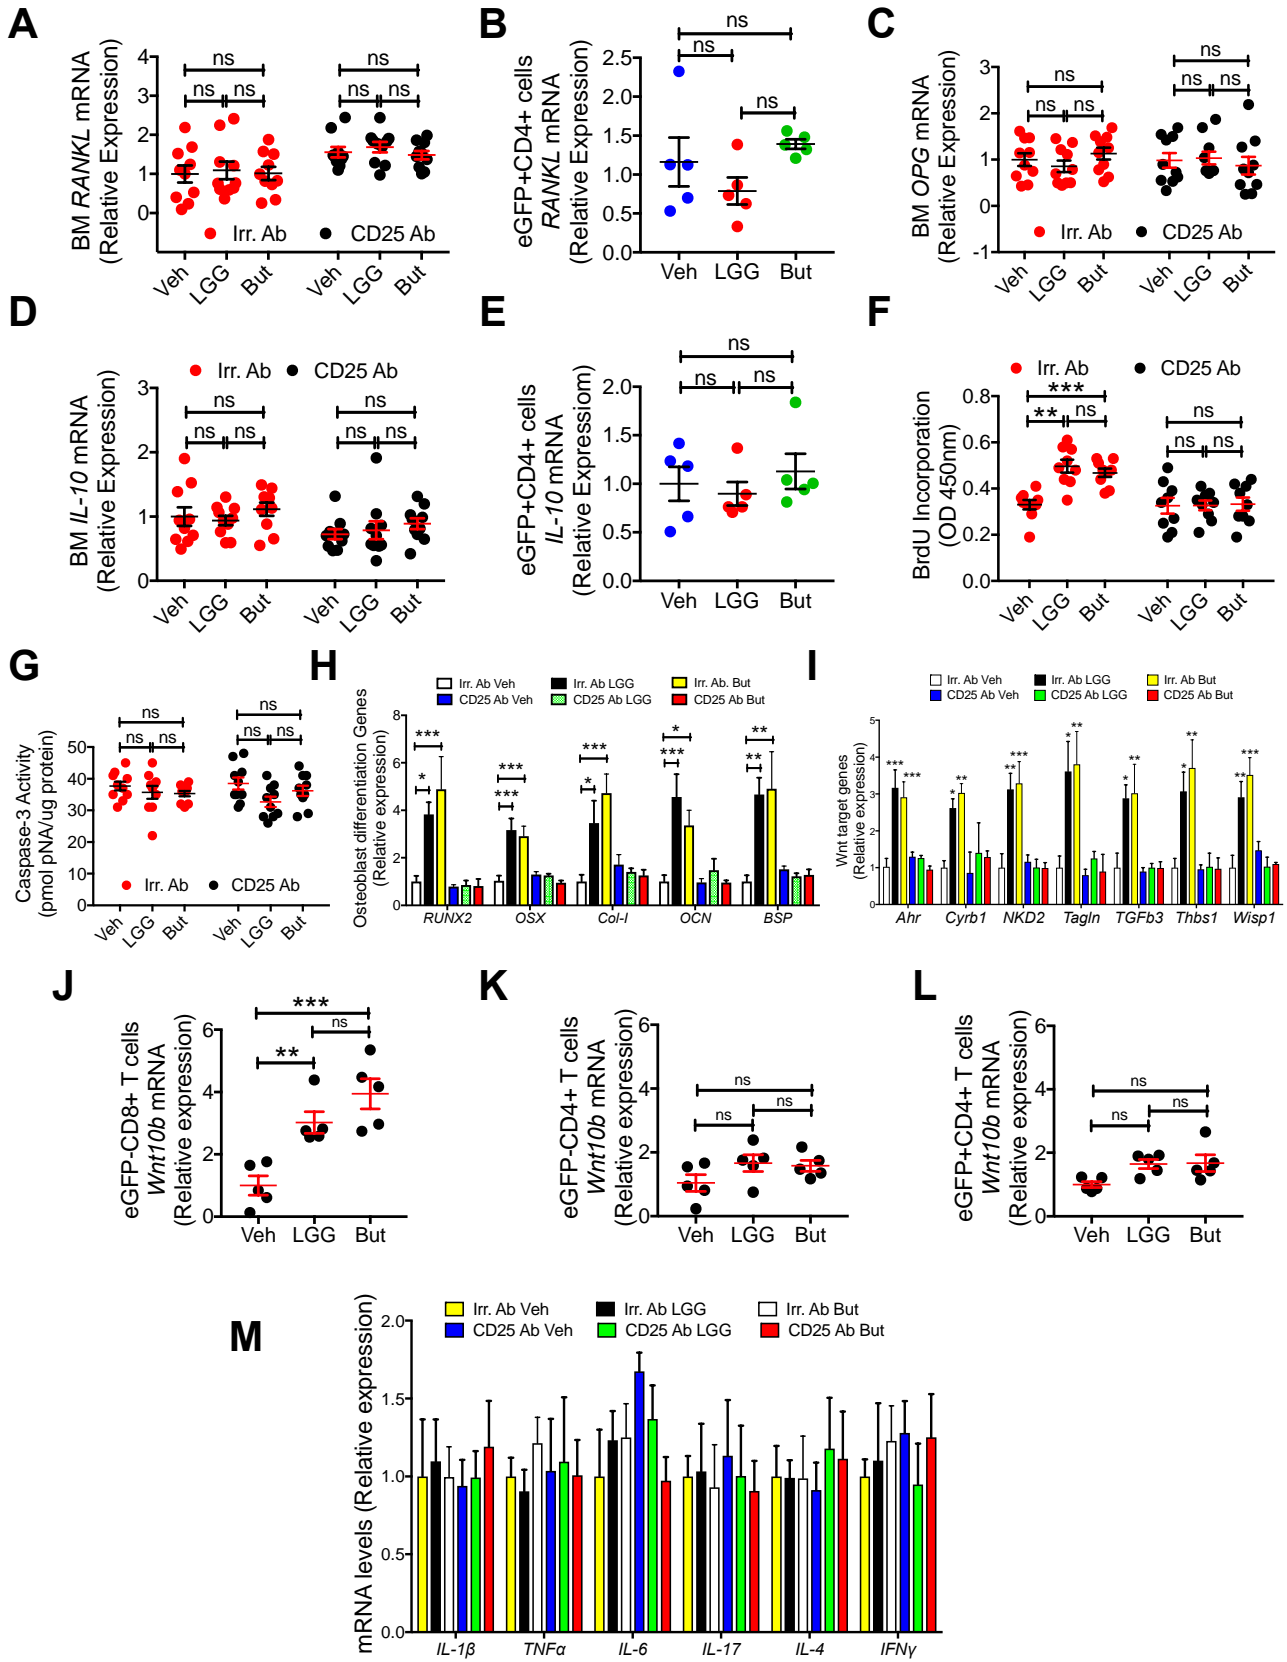

**Figure S3 (Related to Figure 2).** Effects of LGG and butyrate (But) on BM and Treg cells production of cytokines, stromal cell (SC) proliferation, apoptosis differentiation and Wnt dependent gene expression, and T cell expression of *Wnt10b* mRNA. **A.** BM *RANKL* mRNA expression. **B.** *RANKL* mRNA levels in sorted BM T cells from Foxp3.eGFP reporter mice. **C.** BM *OPG* mRNA expression. **D.** BM *IL-10* mRNA expression. **E.** *IL-10* mRNA levels in sorted BM T cells from Foxp3.eGFP reporter mice. **F.** SC proliferation as measured by BrdU incorporation. **G.** SC apoptosis as measured by Caspase-3 activity. **H.** mRNA levels of factors representative of the differentiation of SCs into osteoblasts, **I.** Transcripts of genes that are specifically increased by Wnt signaling in SCs. The analyzed genes were: aryl-hydrocarbon receptor (*Ahr*), *axin2*, cysteine rich protein 61 (*Cyr61*), naked cuticle 2 homolog (*Nkd2*), transgelin (*tagln*), transforming growth factor  $\beta$ 3 (*TGF $\beta$ 3*), thrombospondin 1 (*Thbs1*), Twist gene homolog 1 (*Twist1*) and Wnt1 inducible signaling pathway protein 1 (*Wisp1*). **J-M.** *Wnt10b* mRNA levels in sorted BM T cells from Foxp3.eGFP reporter mice and cytokine production by unfractionated BM cells. Panel J: eGFP-CD8<sup>+</sup> T cells. Panel K: eGFP-CD4<sup>+</sup> T cells. Panel L: Treg cells (eGFP+CD4<sup>+</sup> cells). Panel M: cytokine production by unfractionated BM cells. For each cytokine, there were no significant differences among groups. n = 5-10 mice per group. Data were expressed as Mean  $\pm$  SEM. All data were normally distributed according to the Shapiro-Wilk normality test. All data and analyzed by two-way ANOVA and post hoc tests applying the Bonferroni correction for multiple comparisons. \* = p<0.05, \*\* = p<0.01, and \*\*\* = p<0.001 compared to the indicated group. ns = not significant.

**A**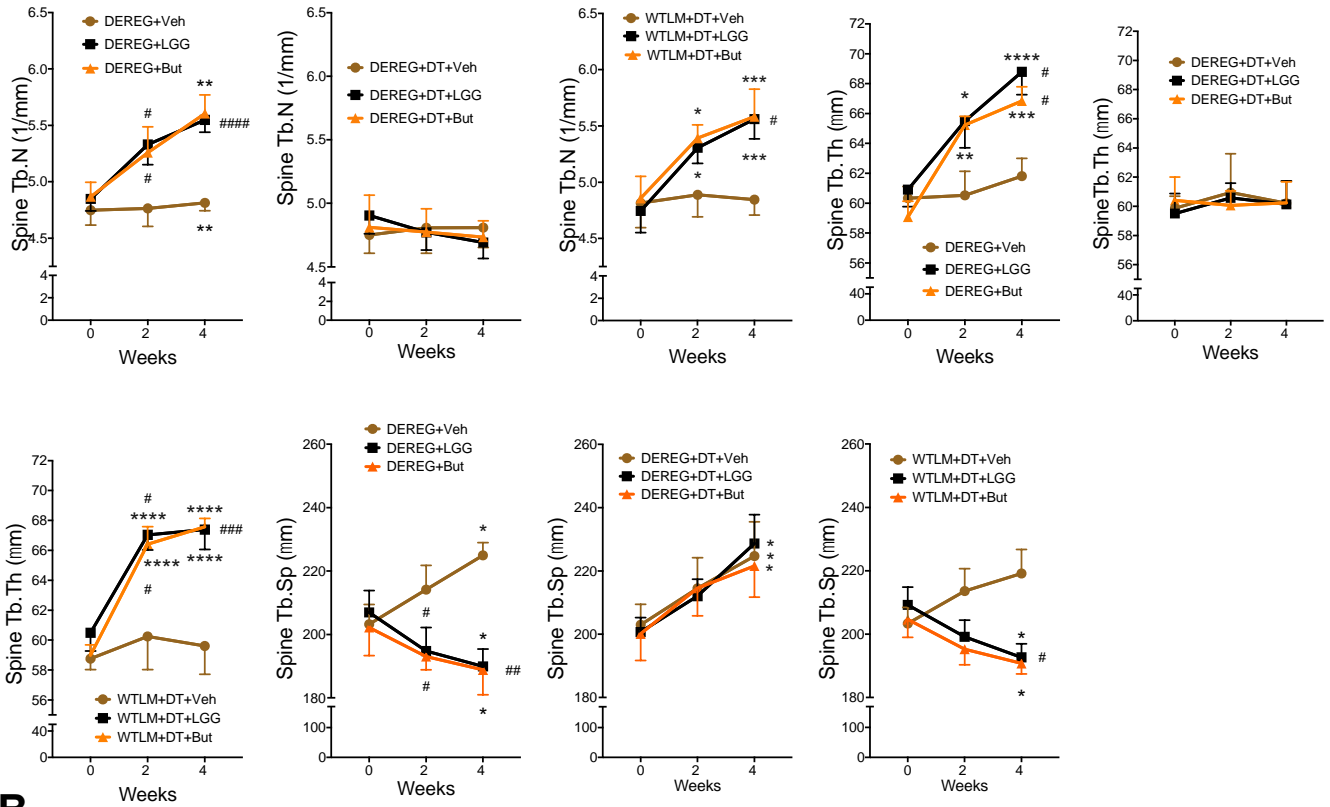**B**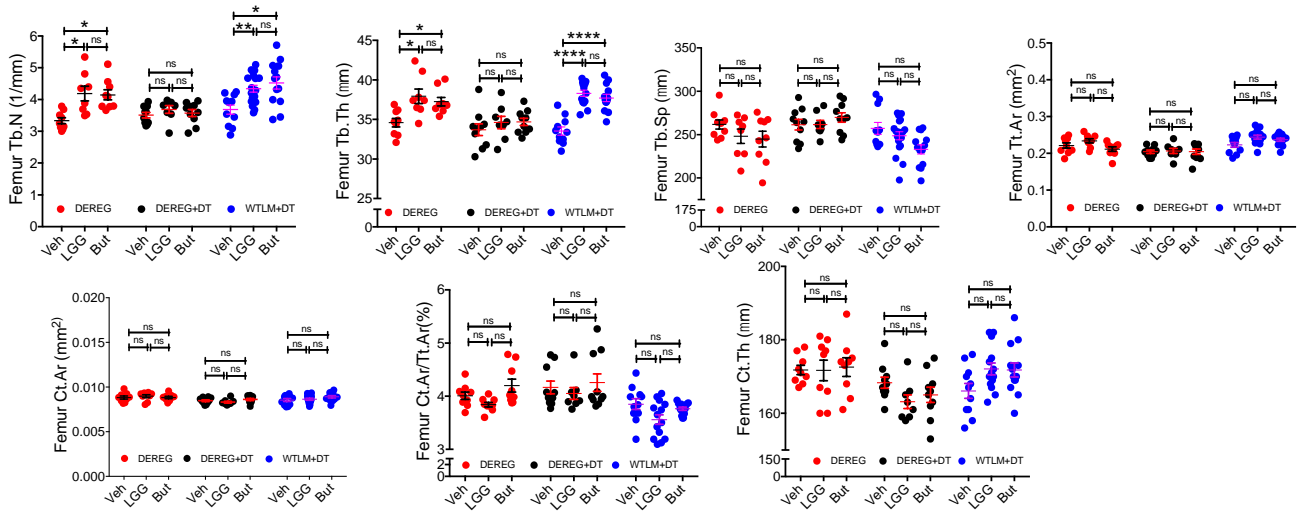**C**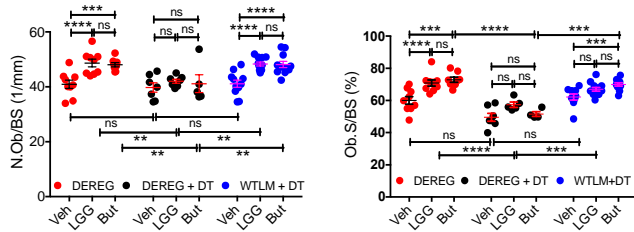

**Figure S4 (Related to Figure 3).** Treatment with Diphtheria Toxin (DT) prevents the bone anabolic activity of LGG and butyrate (But) in DERE mice. **A.** Prospective measurements of vertebral trabecular number (Tb.N), trabecular separation (Tb.Sp) and trabecular thickness (Tb.Th) by in vivo  $\mu$ CT scanning. n = 8-12 mice per group. **B.** Cross-sectional measurements of femoral Tb.N, Tb.Sp, Tb.Th, total cross-sectional area (Tt.Ar), cortical bone area (Ct.Ar), cortical area fraction (Ct.Ar/Tt.Ar), cortical thickness (Ct.Th) by in vitro  $\mu$ CT scanning. n = 8-14 mice per group. **C.** The number of osteoblasts per mm bone surface (N.Ob/BS), and the percentage of bone surface covered by osteoblasts (Ob.S/BS) as measured by bone histomorphometry. n=4-11 mice per group. All data were expressed as Mean  $\pm$  SEM. All data were normally distributed according to the Shapiro-Wilk normality test. Panel A: Data were analyzed by ANOVA for repeated measures. \* =  $p < 0.05$ , \*\* =  $p < 0.01$ , \*\*\* =  $p < 0.001$  and \*\*\*\* =  $p < 0.0001$  compared to baseline, # =  $p < 0.05$ , ## =  $p < 0.01$ , ### =  $p < 0.001$  and #### =  $p < 0.0001$  compared to Irr. Ab vehicle. Panels B,C. Data were analyzed by two-way ANOVA and post hoc tests applying the Bonferroni correction for multiple comparisons. \*= $p < 0.05$ , \*\*= $p < 0.01$ , and \*\*\*\*= $p < 0.0001$  compared to the indicated group. ns = not significant.





**Figure S5 (Related to Figure 5).** Effects of LGG and butyrate (But) on the number of Treg cells, and indices of spinal and vertebral trabecular structure measured by in vivo and in vitro  $\mu$ CT scanning in  $TCR\beta^{-/-}$  mice reconstituted with WT CD4+ and CD8+ T cells or WT CD4+ and  $Wnt10b^{-/-}$  CD8+ T cells. **A.** Relative and absolute number of bone marrow (BM), splenic, and Peyer's Patches Treg cells in T cell deficient  $TCR\beta^{-/-}$  mice adoptively transferred with WT CD4+ T cells and WT CD8+ T cells. Since the enumeration of the absolute number of PP Treg cells is inaccurate, PP Treg cells are shown as % only. n = 9-12 mice per group. **B.** Prospective measurements of vertebral trabecular number (Tb.N), trabecular separation (Tb.Sp) and trabecular thickness (Tb.Th) by in vivo  $\mu$ CT scanning in  $TCR\beta^{-/-}$  mice reconstituted with WT CD4+ and CD8+ T cells or WT CD4+ and  $Wnt10b^{-/-}$  CD8+ T cells. n = 10-12 mice per group. **C.** Cross-sectional measurements of femoral Tb.N, Tb.Sp, Tb.Th, total cross-sectional area (Tt.Ar), cortical bone area (Ct.Ar), cortical area fraction (Ct.Ar/Tt.Ar), cortical thickness (Ct.Th) by in vitro  $\mu$ CT scanning in  $TCR\beta^{-/-}$  mice reconstituted with WT CD4+ and CD8+ T cells or WT CD4+ and  $Wnt10b^{-/-}$  CD8+ T cells. n = 9-12 mice per group. Data were expressed as Mean  $\pm$  SEM. All data were normally distributed according to the Shapiro-Wilk normality test. Panel A: data were analyzed by one-way ANOVA and post hoc tests applying the Bonferroni correction for multiple comparisons. \*\*= $p < 0.01$ , \*\*\*= $p < 0.001$ , and \*\*\*\*= $p < 0.0001$  compared to the indicated group. ns = not significant. Panel B: Data were analyzed by ANOVA for repeated measures and post hoc tests applying the Bonferroni correction for multiple comparisons. \* =  $p < 0.05$ , \*\* =  $p < 0.01$ , and \*\*\* =  $p < 0.001$  compared to baseline, # =  $p < 0.05$  and ## =  $p < 0.01$  compared to vehicle. Panel C: Data were analyzed by two-way analysis-of-variance and post hoc tests applying the Bonferroni correction for multiple comparisons. \* =  $p < 0.05$ , \*\* =  $p < 0.01$ , and \*\*\* =  $p < 0.001$  compared to the indicated group. ns = not significant

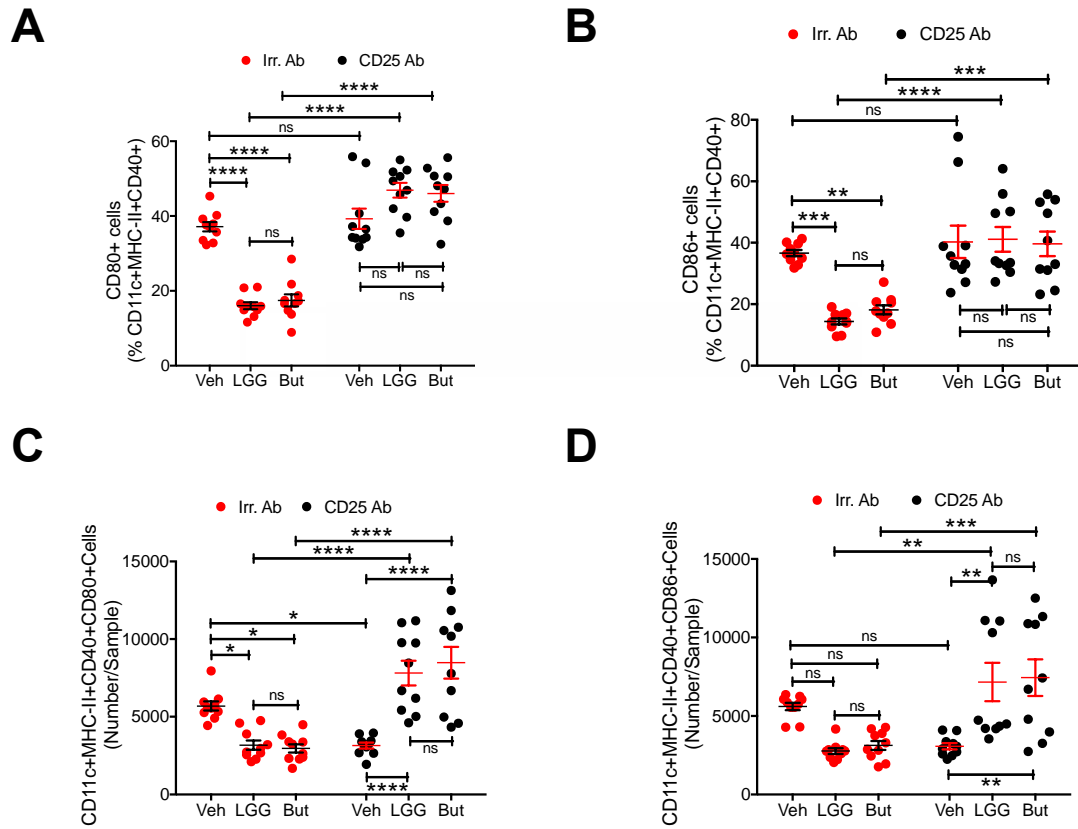

**Figure S6 (Related to Figure 7).** Effects of LGG and butyrate (but) on the expression of CD80 and CD86 by BM mature dendritic cells (DCs). **A.** Relative frequency of BM CD80+ mature DCs. **B.** Relative frequency of BM CD86+ mature DCs. **C.** Absolute frequency of BM CD80+ mature DCs. **D.** Absolute frequency of BM CD86+ mature DCs.  $n = 10$  mice per group. Data were expressed as Mean  $\pm$  SEM. All data were normally distributed according to the Shapiro-Wilk normality test. Data were analyzed by two-way ANOVA and post hoc tests applying the Bonferroni correction for multiple comparisons. \*\*=  $p < 0.01$ , \*\*\*=  $p < 0.001$  and \*\*\*\*=  $p < 0.0001$  compared to vehicle or the indicated group. ns = not significant.

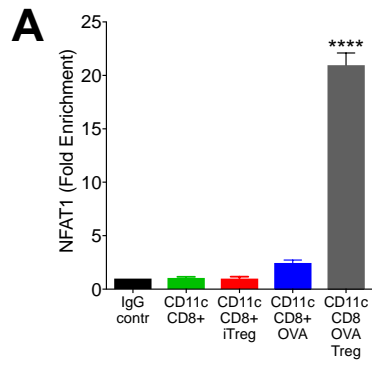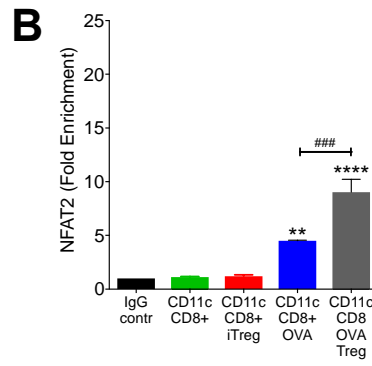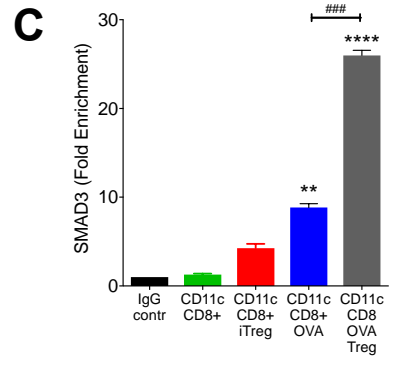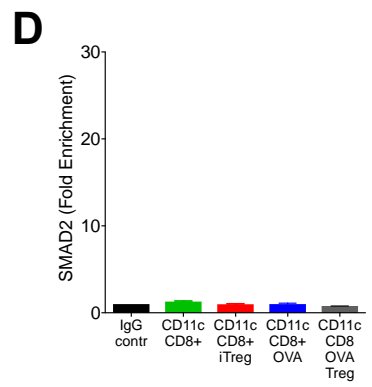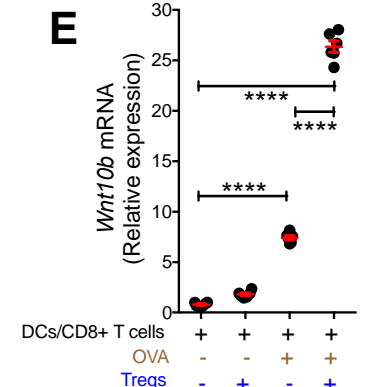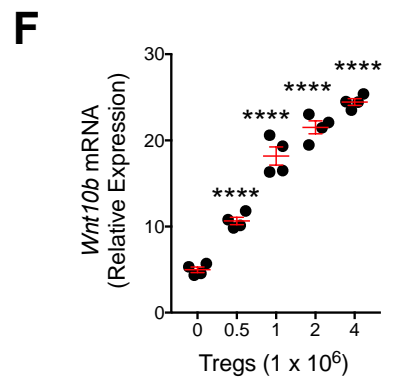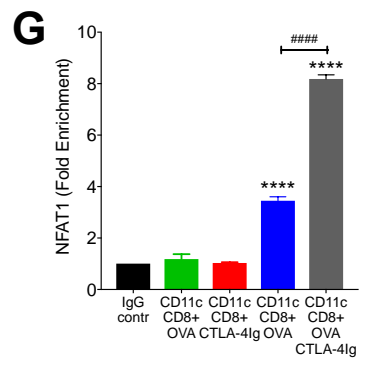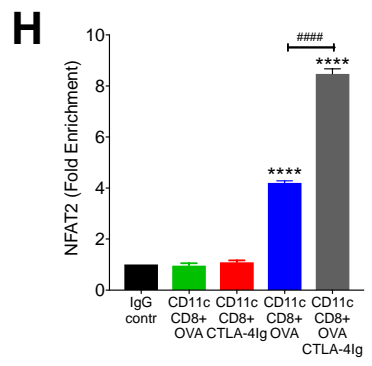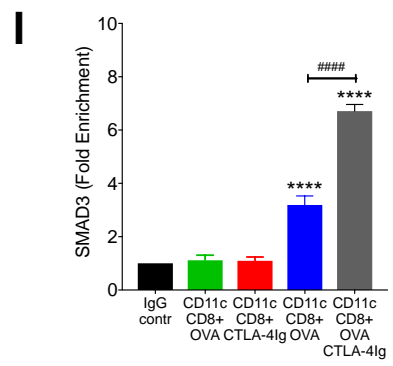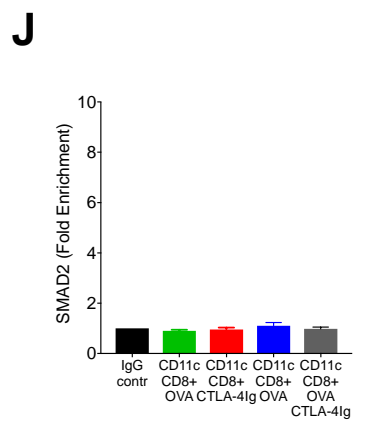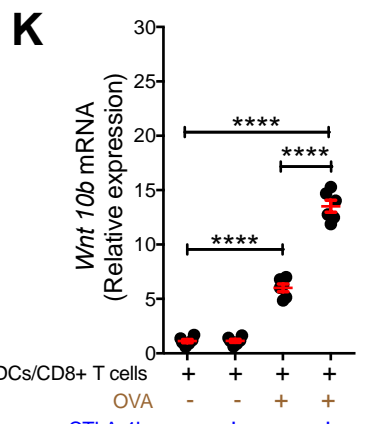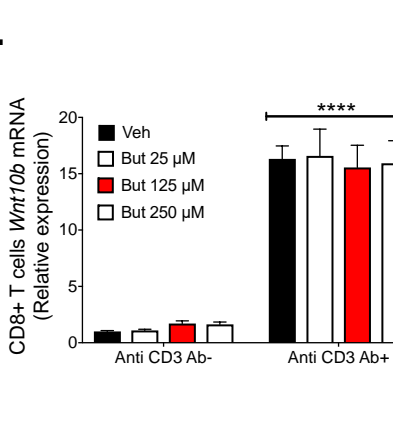

**Figure S7 (Related to Figure 7).** Effects of Treg cells and CTLA-4Ig on NFATs and SMADs binding to the *Wnt10b* promoter and *Wnt10b* mRNA expression. OT-I CD8<sup>+</sup> T cells were cocultured with OVA peptide pulsed CD11c<sup>+</sup> DCs. **A-D.** Addition of induced Treg cells increases the binding of NFAT1/2 and SMAD3 to the *Wnt10b* promoter, as assessed by ChIP assays. **E.** Addition of induced Treg cells increases the expression of *Wnt10b* by CD8<sup>+</sup> T cells. In panels A-E CD8<sup>+</sup> T cells were either unstimulated, activated with OVA peptide pulsed DCs and cultured with and without Treg cells. **F.** Treg cells increase the expression of *Wnt10b* by CD8<sup>+</sup> T cells in a dose dependent manner. CD8<sup>+</sup> T cells were activated with OVA peptide pulsed DCs and cultured with the indicated numbers of Treg cells. **G-J** CTLA-4-Ig increases the binding of NFAT1/2 and SMAD3 to the *Wnt10b* promoter, as assessed by ChIP assays. **K.** CTLA-4-Ig increases the expression of *Wnt10b* by CD8<sup>+</sup> T cells. In panels G-K CD8<sup>+</sup> T cells were unstimulated, activated with OVA peptide pulsed DCs and cultured with and without CTLA-4-Ig. **L.** Addition of butyrate (But) to cultures of resting and anti-CD3 Ab stimulated CD8<sup>+</sup> T cells does not increase *Wnt10b* mRNA expression. Data were expressed as mean + SEM. Panels A-D, G-J and L. n = 3 samples per group. Panels E and K n = 6 samples per group. Panels F n = 4 samples per group. Data were analyzed by Kruskal-Wallis and Dunn's multiple comparisons non-parametric test as they were not normally distributed as assessed by Shapiro-Wilk normality test. \*\*= p<0.01, \*\*\*= p<0.001 and \*\*\*\*= p<0.0001 compared to IgG control or the indicated group. ### = p<0.001 and #### = p<0.0001 compared to the indicated group.

**Table S1 (Related to STAR methods).** Primer sequences for real-time PCRs, ChIP assays, plasmid construction and mutation of binding sites in murine samples.

| <b>Primer Name</b>                         | <b>Forward primer sequence (5'-3')</b> | <b>Reverse primer sequence (5'-3')</b> |
|--------------------------------------------|----------------------------------------|----------------------------------------|
| <b>Mouse <i>Wnt10b</i></b>                 | GGGACCTCGGGTGACA<br>ATAA               | CCTCTGTCCTTTTCCAAC<br>CG               |
| <b>Mouse <i>BSP</i></b>                    | GCACTCCAAGTCCCAA<br>GA                 | TTTTGGAGCCCTGCTTTC<br>TG               |
| <b>Mouse <i>Col1a1</i></b>                 | CCCTACTCAGCCGTCTG<br>TGC               | GGGTTCTGGGCTGATGTA<br>CC               |
| <b>Mouse <i>Ocn</i></b>                    | GCCTTCATGTCCAAGCA<br>GGA               | GCGCCGGAGTCTGTTCA<br>CTA               |
| <b>Mouse <i>Osx</i></b>                    | GTGTTAGTAACCTGGCC<br>GGG               | CATTGGACTTCCCCCTTC<br>TTG              |
| <b>Mouse <i>Runx2</i></b>                  | CTGTGGTTACCGTCATG<br>GCC               | GGAGCTCGGCGGAGTAG<br>TTC               |
| <b>Mouse <i>TNF</i></b>                    | AACTCCAGGCGGTGCCT<br>AT                | TGCCACAAGCAGGAATG<br>AGA               |
| <b>Mouse <i>IL-4</i></b>                   | GGTCTCAACCCCAAGCT<br>AGT               | GCCGATGATCTCTCTCAA<br>GTGAT            |
| <b>Mouse <i>IL-6</i></b>                   | TAGTCCTTCTACCCCA<br>ATTC               | TTGGTCCTTAGCCACTCC<br>TTCC             |
| <b>Mouse <i>IL-13</i></b>                  | CCTGGCTCTTGCTTGCC<br>TT                | GGTCTTGTGTGATGTTGC<br>TCA              |
| <b>Mouse <i>IFN<math>\gamma</math></i></b> | ACAGCAAGGCGAAAAAG<br>GAT               | TGGTGGACCACTCGGAT<br>GAG               |
| <b>Mouse <i>IL-17A</i></b>                 | TGACGCCACCTACAAC<br>ATC                | CATCATGCAGTTCCGTCA<br>GC               |
| <b>Mouse <i>TGF<math>\beta</math>1</i></b> | CCACCTGCAAGACCATC<br>GAC               | CTGGCGAGCCTTAGTTT<br>GGAC              |
| <b>18s ribosomal<br/>RNA</b>               | ATTCGAACGTCTGCCCT<br>ATCA              | GTCACCCGTGGTCACCA<br>TG                |
| <b>Mouse <i>IL-10</i></b>                  | GCTCTTACTGACTGGCA<br>TGAG              | CGCAGCTCTAGGAGCAT<br>GTG               |
| <b>Mouse <i>RANKL</i></b>                  | GCTCTTACTGACTGGCA<br>TGAG              | CGCAGCTCTAGGAGCAT<br>GTG               |
| <b>Mouse <i>OPG</i></b>                    | CCTGATGAAAGGAGGG<br>AGCA               | TGGAATTCAGAATTGCC<br>GA                |

---

|                            |                    |                     |
|----------------------------|--------------------|---------------------|
|                            |                    | TTTTGGGAAAGTGGGAT   |
|                            | CACCTTGAAGGGCCTGA  | GTTTT               |
|                            | TGT                |                     |
| <b>Mouse <i>Wnt10b</i></b> | GGGAGGGAGTGATCCA   | CAGAACCACCCGTGAGT   |
| <b>promoter</b>            | GATA               | TAG                 |
| <b>(ChIP)</b>              |                    |                     |
| <b>Mouse <i>Wnt10b</i></b> | CGACGCGTAGCAAGACT  |                     |
| <b>-2000 bp</b>            | TCAGAGAGGTTAG      |                     |
| <b>(Clone)</b>             |                    |                     |
| <b>Mouse <i>Wnt10b</i></b> | TTACGCGTACTCAGAAA  |                     |
| <b>-1242 bp</b>            | GAGCACCTCCCG       |                     |
| <b>(Clone)</b>             |                    |                     |
| <b>Mouse <i>Wnt10b</i></b> | CGACGCGTCGATGAAA   |                     |
| <b>-272 bp (Clone)</b>     | GACCCTGTCATTG      |                     |
| <b>Mouse <i>Wnt10b</i></b> |                    | TTTAAGCTTGGGAAACTG  |
| <b>+216 bp</b>             |                    | TCGGGTTTCAG         |
| <b>(Clone)</b>             |                    |                     |
| <b>NFAT mut</b>            | taaCGATGAAAGACCCTG | agctTTGCCTCCGAGAGTG |
|                            | TCATTGG            | GGT                 |
| <b>SMAD mut</b>            | gcgtCCGTCCTCAGCGTG | tatgGACCTTAGGGTTACT |
|                            | TCAA               | GACG                |

---
